# Supplementary material for: Effect of Vegetable Juices on Properties of Two Resin Composites Used for Dental Caries Management
Source: MDPI journal article supplement (doi:10.3390/medicina59040774), 2023-04-16
Supplement: s1 [file s1]

**Table S1.** Colour change  $\Delta E$  (Mean  $\pm$  Standard Error of Mean) for Gradia Direct in different test media at different time points

|                 |                    | Day 1           | Day 3           | Day 5           | Day 7           |
|-----------------|--------------------|-----------------|-----------------|-----------------|-----------------|
| Distilled water | $\Delta E \pm SEM$ | $0.82 \pm 0.38$ | $1.19 \pm 0.28$ | $1.25 \pm 0.59$ | $0.70 \pm 0.24$ |
| Beetroot juice  | $\Delta E \pm SEM$ | $0.80 \pm 0.46$ | $2.50 \pm 0.51$ | $3.68 \pm 0.63$ | $5.99 \pm 1.01$ |
|                 | p value            | 0.975           | 0.042*          | 0.013*          | 0.001*          |
| Carrot juice    | $\Delta E \pm SEM$ | $1.03 \pm 0.37$ | $2.44 \pm 0.68$ | $2.72 \pm 0.59$ | $4.38 \pm 0.97$ |
|                 | p value            | 0.698           | 0.114           | 0.154           | 0.005*          |
| Tomato juice    | $\Delta E \pm SEM$ | $1.03 \pm 0.37$ | $2.76 \pm 0.48$ | $4.59 \pm 0.47$ | $8.74 \pm 0.92$ |
|                 | p value            | 0.691           | 0.013*          | < 0.001*        | < 0.001*        |

\*indicates significant difference

**Table S2.** Colour change  $\Delta E$  (Mean  $\pm$  Standard Error of Mean) for Valux Plus samples in different test media at different time points

|                 |                    | Day 1           | Day 3           | Day 5           | Day 7            |
|-----------------|--------------------|-----------------|-----------------|-----------------|------------------|
| Distilled water | $\Delta E \pm SEM$ | $1.24 \pm 0.31$ | $0.74 \pm 0.26$ | $0.57 \pm 0.15$ | $0.48 \pm 0.13$  |
| Beetroot juice  | $\Delta E \pm SEM$ | $2.01 \pm 0.47$ | $6.67 \pm 0.76$ | $7.98 \pm 1.35$ | $11.53 \pm 1.27$ |
|                 | p value            | 0.196           | < 0.001*        | 0.001*          | < 0.001*         |
| Carrot juice    | $\Delta E \pm SEM$ | $1.99 \pm 0.43$ | $5.65 \pm 0.85$ | $7.12 \pm 1.03$ | $10.40 \pm 2.35$ |
|                 | p value            | 0.182           | < 0.001*        | < 0.001*        | 0.003*           |
| Tomato juice    | $\Delta E \pm SEM$ | $1.36 \pm 0.35$ | $3.60 \pm 0.47$ | $5.12 \pm 0.68$ | $6.95 \pm 1.22$  |
|                 | p value            | 0.814           | < 0.001*        | < 0.001*        | < 0.001*         |

\*indicates significant difference
